# Supplementary material
Source: publisher figshare collection journal article supplement (https://sage.figshare.com/ndownloader/files/13748558)
Supplement: Supplementary file 1 [file 13748558]

Supplementary material Table A. Granulometric parameters of Suriano and Cabeza de Buey 2 (LCB2) sediments.

| Section | Sample | Unit | Mean | Sorting | Mode 1 | Mode 2 | Median | Kurtosis | Skewness | %VCS | %CS | %MS | %FS | %VFS | S | Si | C |
| --- | --- | --- | --- | --- | --- | --- | --- | --- | --- | --- | --- | --- | --- | --- | --- | --- | --- |
| Suriano | LB 15-24 | S3 | 3.2 | 0.8 | 3.00-3.25 | - | 3.2 | 1.3 | 0.1 | 0.0 | 1.0 | 3.5 | 33.4 | 46.2 | 84.1 | 14.5 | 1.4 |
| LB 15-25 | S3 | 2.9 | 0.7 | 2.75-3.00 | - | 2.7 | 1.0 | 0.0 | 0.0 | 0.1 | 9.3 | 49.8 | 35.9 | 95.1 | 4.1 | 0.8 |
| LB 15-26 | S3 | 3.0 | 0.7 | 2.75-3.00 | - | 2.8 | 1.5 | 0.1 | 0.0 | 0.1 | 6.5 | 51.9 | 33.0 | 91.5 | 8.5 | 0.0 |
| LB 15-27 | S2 | 2.8 | 0.6 | 2.75-3.00 | - | 2.6 | 1.1 | 0.0 | 0.0 | 0.2 | 10.9 | 57.5 | 28.3 | 96.9 | 3.1 | 0.0 |
| LB 15-29 | S1 | 2.7 | 0.7 | 2.75-3.00 | - | 2.5 | 1.2 | 0.0 | 0.0 | 0.2 | 16.2 | 56.1 | 23.1 | 95.6 | 4.4 | 0.0 |
| LB 15-30 | S1 | 2.7 | 0.7 | 2.75-3.00 | - | 2.5 | 1.2 | 0.1 | 0.0 | 0.2 | 18.3 | 54.4 | 22.2 | 95.1 | 4.7 | 0.2 |
| LCB2 | LB 15-01 | CB5 | 3.1 | 1.3 | 2.50-3.00 | 6.50-7.00 | 2.5 | 2.2 | 0.4 | 0.0 | 0.1 | 15.1 | 48.9 | 20.8 | 84.9 | 15.1 | 0.0 |
| LB 15-02 | CB5 | 3.4 | 1.8 | 2.50-3.00 | 6.00-6.50 | 2.5 | 1.4 | 0.6 | 0.0 | 0.2 | 14.8 | 44.8 | 18.4 | 78.1 | 21.9 | 0.0 |
| LB 15-03 | CB4 | 3.2 | 1.5 | 2.50-3.00 | 6.00-6.50 | 2.6 | 2.0 | 0.5 | 0.0 | 0.2 | 15.5 | 44.0 | 20.8 | 80.6 | 19.4 | 0.0 |
| LB 15-04 | CB4 | 3.5 | 1.6 | 2.50-3.00 | 5.50-6.00 | 2.7 | 0.9 | 0.5 | 0.0 | 0.1 | 12.3 | 40.1 | 21.6 | 74.1 | 25.9 | 0.0 |
| LB 15-05 | CB3 | 3.3 | 1.5 | 2.50-3.00 | 6.50-7.00 | 2.6 | 2.1 | 0.5 | 0.0 | 0.2 | 13.4 | 42.7 | 23.0 | 79.3 | 20.7 | 0.0 |
| LB 15-06 | CB3 | 3.4 | 1.5 | 2.50-3.00 | 6.50-7.00 | 2.7 | 2.1 | 0.4 | 0.0 | 0.1 | 13.1 | 43.1 | 23.1 | 79.4 | 19.6 | 1.0 |
| LB 15-07 | CB3 | 3.5 | 1.6 | 2.50-3.00 | 6.50-7.00 | 2.7 | 1.3 | 0.5 | 0.0 | 0.1 | 12.1 | 41.3 | 21.9 | 75.4 | 23.8 | 0.8 |
| LB 15-08 | CB3 | 3.2 | 1.3 | 2.50-3.00 | 6.50-7.00 | 2.7 | 2.0 | 0.3 | 0.0 | 0.1 | 13.2 | 45.4 | 24.0 | 82.7 | 17.0 | 0.3 |
| LB 15-09 | CB2 | 3.1 | 1.2 | 2.50-3.00 | 6.50-7.00 | 2.6 | 2.1 | 0.3 | 0.0 | 0.1 | 14.0 | 46.4 | 24.9 | 85.4 | 14.5 | 0.1 |
| LB 15-10 | CB2 | 3.2 | 1.2 | 2.50-3.00 | 7.00-7.50 | 2.6 | 2.1 | 0.2 | 0.0 | 0.1 | 12.7 | 45.0 | 27.7 | 85.4 | 13.6 | 1.0 |
| LB 15-11 | CB2 | 3.3 | 1.2 | 2.50-3.00 | 6.50-7.00 | 2.8 | 1.9 | 0.2 | 0.0 | 0.4 | 9.7 | 39.1 | 33.6 | 82.8 | 16.0 | 1.2 |
| LB 15-32 | CB1 | 3.3 | 1.1 | 5.50-6.00 | 5.50-6.00 | 2.9 | 1.6 | 0.2 | 0.0 | 0.1 | 8.1 | 33.8 | 39.0 | 80.0 | 19.0 | 1.0 |

Mean and mode in phi units;VCS: very coarse sand; CS: coarse sand; MS: medium sand; FS: fine sand; VFS: very fine sand (according to Udden-Wentworth grain-size scale); S: % sand; Si: % silt; C: % clay.
